## ***Staphylococcal* secreted cytotoxins are competition sensing signals for *Pseudomonas aeruginosa***

Grace Z. Wang<sup>1</sup>, Elizabeth A. Warren<sup>2</sup>, Allison L. Haas<sup>3</sup>, Andrea Sánchez Peña<sup>2</sup>, Megan R. Kiedrowski<sup>3</sup>, Brett Lomenick<sup>4</sup>, Tsui-Fen Chou<sup>4</sup>, Jennifer M. Bomberger<sup>3,5\*</sup>, David A. Tirrell<sup>1</sup>, Dominique H. Limoli<sup>2\*</sup>

<sup>1</sup> Division of Chemistry and Chemical Engineering, California Institute of Technology, Pasadena, CA, USA

<sup>2</sup> Department of Microbiology and Immunology, Carver College of Medicine, University of Iowa, Iowa City, IA, USA

<sup>3</sup> Department of Microbiology and Molecular Genetics, University of Pittsburgh, Pittsburgh, PA, USA

<sup>4</sup> Beckman Institute, California Institute of Technology, Pasadena, CA, USA

<sup>5</sup> Geisel School of Medicine at Dartmouth, Hanover, NH, USA

\* Corresponding author

### **ABSTRACT**

Coinfection with two notorious opportunistic pathogens, the Gram-negative *Pseudomonas aeruginosa* and Gram-positive *Staphylococcus aureus*, dominates chronic pulmonary infections. While coinfection is associated with poor patient outcomes, the interspecies interactions responsible for such decline remain unknown. Here, we dissected molecular mechanisms of interspecies sensing between *P. aeruginosa* and *S. aureus*. We discovered that *P. aeruginosa* senses *S. aureus* secreted peptides and, counterintuitively, moves towards these toxins. *P. aeruginosa* tolerates such a strategy through “competition sensing”, whereby it preempts imminent danger/competition by arming cells with type six secretion (T6S) and iron acquisition systems. Intriguingly, while T6S is predominantly described as weaponry targeting Gram-negative and eukaryotic cells, we find that T6S is essential for full *P. aeruginosa* competition with *S. aureus*, a previously undescribed role for T6S. Importantly, competition sensing was activated during coinfection of bronchial epithelia, including T6S islands targeting human cells. This study reveals critical insight into both interspecies competition and how antagonism may cause collateral damage to the host environment.

## 1 INTRODUCTION

2 The future of microbiome research lies in our ability to manipulate polymicrobial interactions toward  
3 improved human health outcomes, which requires a fundamental molecular understanding of how  
4 microbial species sense and respond to ecological competition. Chronic respiratory infections in people  
5 with cystic fibrosis (CF) consist of diverse and heterogeneous microbial communities<sup>1</sup>. Nonetheless,  
6 *Pseudomonas aeruginosa* and *Staphylococcus aureus* are the most prevalent<sup>2,3</sup>. Critically, coinfection  
7 with these pathogens correlates with worsened clinical outcome and altered antibiotic efficacy<sup>2-4</sup>, urging  
8 the need for molecular dissection of their interspecies crosstalk.

9  
10 We previously reported that *P. aeruginosa* is attracted to *S. aureus* resulting in invasion of *S. aureus*  
11 colonies<sup>5</sup>; however, what, if any, selective benefit *P. aeruginosa* achieves by adopting this behavior  
12 remains unknown. A potential role for such a strategy may be to bridge cellular distances for contact-  
13 dependent mechanisms of antagonism. The type six secretion system (T6SS), widely found in Gram-  
14 negative bacteria, such as *P. aeruginosa*, equips cells with a versatile nanomachinery that functions as  
15 an interspecies weapon capable of targeting both eukaryotic and prokaryotic cells<sup>6-8</sup>. *P. aeruginosa*  
16 typically maintains low basal T6SS activity but is capable of rapid reciprocal firing following T6SS attack  
17 by other Gram-negative species<sup>9,10</sup>. However, whether an analogous response may occur in response to  
18 Gram-positive competitors lacking T6SS remains unknown. A greater fundamental understanding of  
19 interspecies pathogen sensing and resulting competition, particularly between Gram negative and  
20 positive pathogens common during coinfection, is necessary to develop interventions directed at  
21 interspecies interactions.

22  
23 Here, we report the discovery that *P. aeruginosa* rapidly activates T6SS after an encounter with the  
24 Gram-positive pathogen *S. aureus*. We present a “competition sensing” model uncovered by a  
25 combination of genetics, microscopy and multi-omics approaches whereby secreted *Staphylococcal*  
26 peptides are key interspecies signals that trigger *P. aeruginosa* antagonism. *P. aeruginosa* was found to  
27 sense *S. aureus* via secreted peptides at a distance, subsequently increasing directional motility and  
28 activating T6SS antagonism. Surprisingly, such activation allowed for T6SS-dependent competition with  
29 *S. aureus*, extending the functional role of T6SS to not only competition between Gram-negatives, but  
30 also between Gram-negative and positive bacteria. Furthermore, we examined coinfection on fully  
31 differentiated CF-derived bronchial epithelia, the gold standard model of *in vivo* CF airway infection, and  
32 found *P. aeruginosa* T6SS was activated, including host-targeting T6SS islands. Overall, these results  
33 broaden our mechanistic understanding of interspecies antagonism between distantly related species,

34 reveal interspecies pathways that might be targeted therapeutically, and lend insight into the mechanism  
35 of increased patient decline during coinfection with *P. aeruginosa* and *S. aureus*.

36

## 37 RESULTS

### 38 PSM $\alpha$ peptides are necessary and sufficient for *P. aeruginosa* attraction toward *S. aureus*

39 We previously reported that *P. aeruginosa* travels up a gradient of *S. aureus* secreted factors using type-  
40 IV pilus (TFP)-dependent motility<sup>5</sup>. The *S. aureus* attractants identified are secreted *S. aureus* peptides,  
41 referred to as phenol soluble modulins (PSMs). *S. aureus* produces five alpha peptides: PSM $\alpha$ 1-4 and  
42 PSM $\delta$  ( $\delta$  toxin) and two  $\beta$ -peptides: PSM $\beta$ 1 and 2 (**Supplementary Fig. 1**). Here, we first asked if *P.*  
43 *aeruginosa* possesses specificity in attraction towards individual peptides in a macroscopic TFP  
44 chemotaxis assay (**Fig. 1a**). PSM $\alpha$  peptides were examined for initial characterization given that the  $\alpha$   
45 peptides have known roles in neutrophil chemoattraction<sup>11</sup> and cytotoxicity to mammalian host cells<sup>12</sup>. *P.*  
46 *aeruginosa* traveled further towards an increasing gradient of WT *S. aureus* supernatant (**Fig. 1b**),  
47 whereas directional motility towards supernatant derived from a double *psma*1-4 and *psm $\delta$*  mutant  
48 ( $\Delta$ *psma*1-4  $\delta$ ATG-ATT, **Supplementary Fig. 1**) was eliminated, suggesting that at least one  $\alpha$ -peptide is  
49 necessary for attracting *P. aeruginosa* (**Fig. 1b, c**). The magnitude of attraction towards  $\Delta$ *psma*1-4 was  
50 between WT *S. aureus* and the double  $\Delta$ *psma*1-4  $\delta$ ATG-ATT mutants, suggesting PSM $\delta$ , along with the  
51 other  $\alpha$  peptides, is necessary for *P. aeruginosa* directional motility. We then determined if PSMs are  
52 sufficient to attract *P. aeruginosa* and the specificity of individual PSM peptide's contribution. Pure  
53 synthetic PSM $\alpha$ 3 and  $\delta$ -toxin strongly attracted *P. aeruginosa* in a dose-dependent manner (**Fig. 1d**).  
54 These data demonstrate that PSM $\delta$  and PSM $\alpha$ 3 are necessary and sufficient for *S. aureus* to attract *P.*  
55 *aeruginosa*.

56

57 It has been widely acknowledged that *P. aeruginosa* outcompetes *S. aureus in vitro*<sup>13-16</sup>, though the exact  
58 mechanisms of cellular death are poorly elucidated. Curiously, when PSM-deficient *S. aureus* were  
59 cocultured with *P. aeruginosa*, a moderate increase in *S. aureus* survival was observed (**Fig. 1e**). Addition  
60 of PSM peptides to coculture with the  $\Delta$ *psm* mutant restored *S. aureus* survival to the reduced level seen  
61 with WT strains, raising the possibility that there exist unknown PSM-dependent killing mechanisms  
62 between *P. aeruginosa* and *S. aureus*. These factors further led us to investigate the roles of PSMs in  
63 mediating *P. aeruginosa* responses to *S. aureus*, and the cellular events occurring after *P. aeruginosa*  
64 cells are recruited to the site of *S. aureus*.

65

### 66 *P. aeruginosa* undergoes immediate, systematic proteome remodeling in response to PSM 67 peptide pulse-in and coculture with *S. aureus*

68 To gain insight into the effects PSMs have on *P. aeruginosa* cellular functions, we took advantage of the  
69 precise temporal resolution afforded by BioOrthogonal Non-Canonical Amino acid Tagging (BONCAT)<sup>17</sup>  
70 to monitor *P. aeruginosa* immediate protein synthesis in response either to direct addition of PSMs or to  
71 coculture with *S. aureus* cells (**Fig. 2a**). *P. aeruginosa* cells constitutively expressing an engineered  
72 mutant methionyl-tRNA synthetase (NLL-MetRS) allow for selective metabolic labeling of newly  
73 synthesized proteins by the azide-bearing methionine (Met) analog: azidonorleucine (Anl)  
74 (**Supplementary Fig. 2**). Downstream chemical enrichment<sup>18</sup> of labeled proteins enables targeted  
75 analysis of nascent *P. aeruginosa* protein synthesis during the Anl labeling period.

76

77 We identified 3348 and 3365 total proteins newly synthesized by *P. aeruginosa* during the 30-min labeling  
78 period immediately following PSM pulse-in and coculture with *S. aureus*, respectively (**Fig. 2b, c**), and  
79 quantified differentially expressed proteins in each condition. We found 60 *P. aeruginosa* proteins with  
80 statistically significant and greater than 2-fold increase and 98 with greater than 2-fold decrease in  
81 abundances in response to PSMs pulse-in. For coculture with *S. aureus* compared to monoculture, 178  
82 proteins with significant increase (>2-fold) in abundances and 124 with significant decrease (>2-fold) in  
83 abundances (**Supplementary Table 2**). Candidates were then grouped by their annotated functional  
84 categories, which include the following: T6SS, pyoverdine biosynthesis, cyclic di-GMP sensing/regulating  
85 enzymes, chemotaxis/motility, cellular response to envelope stress, and DNA damage/stress response  
86 (**Fig. 2d, e**). Strikingly, PSMs alone are sufficient to promote the synthesis of proteins in each category.

87

### 88 ***P. aeruginosa* activates T6SS in response to PSMs and *S. aureus* cells**

89 Notably, proteins involved in T6SS are over-represented among the total significantly up-regulated hits  
90 in *P. aeruginosa* global proteomic response to PSM pulse-in and *S. aureus* coculture (**Fig. 3**,  
91 **Supplementary Fig. 3**). *P. aeruginosa* T6SS is a spear-gun-shaped secretory apparatus that loads and  
92 injects toxic cargo into prey cells. We detected significantly increased synthesis of various components  
93 of the T6SS structural architecture, including core, accessory, bacteriophage-like subunits, and  
94 membrane-associated components<sup>19,20</sup> (**Fig. 3a, c**), suggesting the T6SS apparatus is being  
95 systematically assembled during the 30-min labeling period following introduction of PSMs or *S. aureus*.  
96 In particular, the expression levels of two proteins—the hemolysin coregulated protein (Hcp, T6SS  
97 “sheath”) and the valine-glycine repeat protein G (VgrG, T6SS “tip”)—are often used to determine  
98 whether T6SS is functional<sup>5,6,20,21</sup>. Their relative fold-changes are the highest among other T6SS proteins  
99 that showed significantly changed abundances in response to PSM pulse-in or coculture with *S. aureus*  
100 (**Fig. 3a**). Additionally, proteins encoded by all three known *P. aeruginosa* T6SS loci, denoted HSI-I  
101 (PA00-), HSI-II (PA16-) and HSI-III (PA23-)<sup>5,19,20</sup> were increased (**Fig. 3a, c**), further supporting that *P.*

102 *aeruginosa* systematically up-regulates T6SS after encountering *S. aureus* via sensing of *Staphylococcal*  
103 secreted PSMs.

104

105 We next ranked the nascent *P. aeruginosa* proteome by individual protein raw abundances quantified by  
106 label-free quantification (LFQ) via mass spectrometry (**Supplementary Fig. 4**) to examine cellular  
107 allocation of protein synthesis resources following PSM pulse-in and *S. aureus* coculture challenge.  
108 Remarkably, most T6SS proteins appeared in the top quartile with significantly elevated average  
109 abundances in PSM-treated and *S. aureus* coculture samples compared to untreated/monoculture  
110 controls, further indicating T6SS antagonism is prioritized by *P. aeruginosa* in responding to interspecies  
111 stress.

112

113 Although T6SS apparatus assembly does not necessarily indicate firing of T6SS effectors, significantly  
114 higher abundances of the AAA+ ATPases ClpV (**Fig. 3a, c**) suggest increased sheath contraction and  
115 propulsion of effectors<sup>22-24</sup>. To examine *P. aeruginosa* deployment of T6SS, single-cell microscopy using  
116 a fluorescent reporter of ClpV1 activity was employed (ClpV1-GFPmut3<sup>9</sup>) and confirmed that PSMs are  
117 sufficient to induce *P. aeruginosa* deployment of T6SS (**Fig. 3d**). PSM-treated cells exhibited both  
118 significantly increased GFPmut3 puncta formation (**Fig. 3e**) as well as overall fluorescence intensity (**Fig.**  
119 **3f**) per cellular total area, further supporting that PSMs induce interspecies antagonistic T6SS attacks by  
120 *P. aeruginosa*.

121

### 122 ***Staphylococcal* secreted PSM peptides increase siderophore biosynthesis**

123 We also observed that the T6SS induction in *P. aeruginosa* is accompanied by systematic upregulation  
124 of the pyoverdine biosynthesis cluster (**Supplementary Fig. 3**), which produces a siderophore that binds  
125 to extracellular Fe<sup>3+</sup> with high affinity<sup>25,26</sup>. Iron starvation is a major stress response pathway evolutionarily  
126 conserved in bacteria. Proteins encoded by five pyoverdine operons (**Fig. 3b**) entirely covering the  
127 complex cellular biosynthesis machinery for pyoverdine siderophore were found to be significantly up-  
128 regulated in response to PSM pulse-in or *S. aureus* coculture—including the extracytoplasmic  
129 function iron starvation  $\sigma$  factor PvdS, which positively regulates pyoverdine biosynthesis and  
130 secretion<sup>27</sup>, and PvdR, which controls transport of pyoverdine out of the cell<sup>28</sup>, indicating that  
131 siderophores are being increasingly synthesized and dispatched out of the cell during the 30-min labeling  
132 period. Thus, we simultaneously monitored pyoverdine production and induction of gene expression  
133 using a fluorescent reporter *P'pvdG-mScarlet*<sup>29</sup> (**Supplementary Fig. 5**). Consistent with the proteomic  
134 results, we observed significantly increased pyoverdine production by *P. aeruginosa* following PSMs  
135 treatment, as well as significant induction of *pvdG* promoter activity.

136

137 Pathogens face intense competition for iron with host and other microbial species due to the essentiality  
138 of iron as a nutrition source, and siderophore production is often reported to be involved in exploitive  
139 interspecies competition<sup>13,30,31</sup>. Interestingly, a recent study reported upregulation of siderophore  
140 biosynthesis in *P. aeruginosa* when treated with *Staphylococcal* culture supernatant<sup>29</sup>, though the  
141 molecular signals responsible for the observed upregulation remained elusive. Here, we show that  
142 *Staphylococcal* secreted PSM peptides alone could trigger increased pyoverdine biosynthesis and export,  
143 further suggesting that PSMs play important roles in mediating interspecies competition between *P.*  
144 *aeruginosa* and *S. aureus*.

145

#### 146 **PSMs may activate competition sensing via induction of transient membrane stress**

147 We next probed the molecular mechanism of PSM-induced T6SS activation. Previous literature suggests  
148 *P. aeruginosa* T6SS could be induced via kin cell lysis<sup>9</sup> and/or envelope stress<sup>32</sup>. In particular, the pore-  
149 forming antibiotic polymyxin B induces T6SS in *P. aeruginosa* via endogenous membrane stress<sup>32</sup>.

150

151 *S. aureus* secreted PSMs are virulence factors with hemolytic activity toward mammalian cells<sup>11</sup>. While  
152 PSMs generally exhibit low activity towards bacterial membranes<sup>33</sup>, we asked whether PSMs could  
153 permeabilize the *P. aeruginosa* membrane, cause kin cell lysis, and/or cause envelope stress in *P.*  
154 *aeruginosa*. Live imaging of *P. aeruginosa* with propidium iodide +/- PSMs did not show evidence of kin  
155 lysis, inner membrane permeability (**Fig. 4a**), or altered *P. aeruginosa* growth rate (**Supplementary Fig.**  
156 **6a**). In comparison, polymyxin B significantly inhibited *P. aeruginosa* growth (**Supplemental Fig. 6a**) and  
157 induced a moderate uptake of propidium iodide (**Fig. 4a**). Further analysis of outer membrane  
158 permeability by uptake of 1-N-phenyl-naphthylamine (NPN) also did not reveal significant permeability  
159 with PSM treatment, while polymyxin significantly induced outer membrane permeability (**Fig. 4b**).

160

161 Given these differences in membrane activity between polymyxin B and PSMs, we revisited T6SS  
162 activation by polymyxin B with ClpV1 fluorescent reporter<sup>9</sup> under the current study conditions for  
163 comparison. Polymyxin B-treated cells displayed distinct ClpV1 puncta induction (**Fig. 4c**) but yielded low  
164 mean fluorescence intensity per cell (**Fig. 4d**), suggesting potential molecular differences between  
165 mechanisms of T6SS induction by polymyxin B versus by PSMs treatment. Polymyxin B can be inserted  
166 into the membrane, causing cell lysis by creating pores in the envelope<sup>34</sup>. In contrast, PSMs are cationic,  
167 amphipathic small helical peptides with membrane perturbing and cell surface-adhering properties<sup>35</sup>.

168

169 While we were unable to detect significant membrane damaging activity by PSMs, we hypothesize that  
170 non-lethal membrane perturbations may explain PSM-induced T6SS activation in *P. aeruginosa*. Several  
171 factors contributed to this hypothesis: first, global differential proteomic profiling revealed significant and  
172 systematically decreased production of electron transport chain (ETC) enzymes in response to PSMs  
173 pulse-in and coculture with *S. aureus* (**Fig. 4e, f, Supplementary Fig. 3**), a characterized cellular  
174 response to envelope stress evolutionarily conserved in *E. coli* and other Gram-negative bacteria<sup>36–39</sup>. In  
175 addition, while we did not detect increased protein synthesis of classic regulators of membrane stress,  
176 such as  $\sigma^E$  and CpxAR<sup>39</sup>, we observed significant up-regulation of a subset of proteins involved in  
177 membrane stress responses, most notably protein encoded by *PA3731*, a close homologue of the phage  
178 shock protein PspA in *E. coli* and member of a family of proteins characterized to play crucial roles in the  
179 cellular response to and protection against envelope stress in *E. coli* and other Gram-negative species<sup>40,41</sup>.  
180 Therefore, we hypothesize that PSMs provoke *P. aeruginosa* T6SS firing via induction of cell envelope  
181 stress via short-term perturbations.

182

### 183 **Significantly increased *P. aeruginosa* T6SS activity in coculture with *S. aureus* on CF patient-** 184 **derived bronchial epithelial cells**

185 Previous studies reported that Hcp1 is detected at high levels in chronic CF sputum<sup>5</sup>, and HSI-II and III  
186 T6SS are required for and induced upon *P. aeruginosa* infection of epithelial cells<sup>7,42</sup>, suggesting that  
187 differential regulation of any of the three T6SS loci in polymicrobial infections may have implications for  
188 the host. Prompted by the fact that all three HSI-T6SS loci in *P. aeruginosa* have previously characterized  
189 roles in CF pathogenicity, we further investigated *P. aeruginosa* and *S. aureus* interactions in a host-  
190 derived environment to explore interspecies virulence factor crosstalk in a clinically relevant context.

191

192 For this purpose, we obtained the health care-associated methicillin-resistant *Staphylococcus aureus*  
193 (HA-MRSA) strain USA100, a highly antibiotic resistant clinical isolate and a leading cause of invasive  
194 infections by MRSA<sup>43,44</sup>, and *P. aeruginosa* strain PAO1, a laboratory derivative more closely related than  
195 PA14 to most clinical isolates of CF<sup>45</sup>. We performed RNA-sequencing to examine *P. aeruginosa*  
196 transcriptomic changes that contribute to interspecies interactions in a coinfection model with *S. aureus*  
197 using polarized, fully differentiated CF bronchial epithelial cells (CFBE41o-, **Fig. 5a**). This model closely  
198 mimics the CF host environment by recapitulating approximately 84% of *P. aeruginosa* gene expression  
199 in human expectorated CF sputum, outperforming both laboratory media and the acute mouse  
200 pneumonia model of infection<sup>46</sup>.

201

202 We identified 1,325 differentially expressed genes during coculture with *S. aureus* (fold change >2 or <-  
203 2, P<0.05). Of these, we detected increased transcription of T6SS genes from all three HSI-T6SS clusters  
204 (**Fig. 5b, c**). Transcription of *hcp*, *vgrG*, and sheath genes was significantly increased, suggesting that  
205 the T6SS apparatus is functional. In addition, we observed significantly increased transcription of several  
206 effector genes including *tse1* (*PA1844*), a peptidoglycan amidase<sup>47</sup>, *pldB* (*PA5089*), a phospholipase<sup>48</sup>,  
207 and *tseF* (*PA2374*)<sup>49</sup>, a known facilitator of iron uptake in *P. aeruginosa*<sup>48</sup>.

208

### 209 ***P. aeruginosa* T6SS mediates the killing of *S. aureus***

210 A wealth of existing literature shows that T6SS-delivered effectors target and kill Gram-negative  
211 bacteria<sup>9,10,20,47</sup>. However, until a recent study that demonstrated T6SS secreted effectors by  
212 *Acinetobacter baumannii* could kill Gram-positive bacteria<sup>50</sup>, it had previously been assumed that Gram-  
213 positive species are not susceptible to T6SS-mediated killing<sup>51</sup>.

214

215 To examine if T6SS activity provides *P. aeruginosa* a competitive advantage in coculture with *S. aureus*  
216 in association with airway epithelial cells, we constructed clean deletions of each HSI T6SS sheath gene,  
217  $\Delta tssB1$  (H1),  $\Delta hsiB2$  (H2), and  $\Delta hsiB3$  (H3), and surprisingly found that each mutant exhibited decreased  
218 competitive index compared to WT in coculture with *S. aureus* in the airway cell model (**Fig. 6a, b**). We  
219 next focused on a HSI-III T6SS-encoded effector TseF for several reasons. First, *tseF* (*PA2374*) was the  
220 most significantly up-regulated effector in coinfection with *S. aureus* on host cells (**Fig. 5c**). Secondly,  
221 TseF facilitates *P. aeruginosa* iron uptake<sup>49</sup>, a functional role likely to affect polymicrobial competition.  
222 Further, TseF was characterized to be coregulated with the *Pseudomonas* quinolone signal<sup>49</sup>, a quorum-  
223 sensing system in *P. aeruginosa* with known roles in competition against *S. aureus*<sup>15</sup>. Interestingly,  
224 deletion of *tseF* alone significantly reduced *P. aeruginosa* competitive fitness against *S. aureus* and  
225 rescued *S. aureus* survival in coculture (**Fig. 6a, b**).

226

### 227 **DISCUSSION**

228 The “competition-sensing” hypothesis states that bacteria adapt evolutionarily conserved stress response  
229 pathways to directly detect and respond to ecological competition<sup>52</sup>. The results presented here provide  
230 empirical evidence for this hypothesis, which predicts increased bacterial toxin production in response to  
231 stress caused by competitors. We propose a model in accordance, whereby *P. aeruginosa* senses  
232 transient cellular stress caused by secreted competitor signals and swiftly responds by moving towards  
233 the signals and activating antagonistic responses (**Fig. 7**). Activation of membrane stress and iron



234 starvation responses observed in *P. aeruginosa* further supports that “competition sensing” is manifested  
235 in several stress response pathways.

236

237 *P. aeruginosa* is attracted to diverse bacterial species and moves towards the site of competition<sup>5</sup>; thus,  
238 a close analogy can be drawn between *P. aeruginosa* and the notorious predacious bacterium,  
239 *Myxococcus xanthus*, characterized to coordinate group responses to invade and lyse prey<sup>53</sup>. *P.*  
240 *aeruginosa* displays incipient multicellularity via complex collective behaviors, including ones of a  
241 predatory nature as described here. We propose that upon sensing interspecies signals, *P. aeruginosa*  
242 cells move to “trap” a *S. aureus* colony, further enabling contact-dependent invasion and/or local  
243 concentration of secreted antimicrobials.

244

245 One potential mechanistic model of competition sensing is that *P. aeruginosa* closely monitors cell  
246 envelope integrity to detect environmental and/or interspecies insults. While PSMs do not affect the *P.*  
247 *aeruginosa* membrane sufficiently to allow permeabilization, even transient envelope stress may induce  
248 T6SS assembly and firing. Interestingly, it has been recently reported that *P. aeruginosa* chemotaxis  
249 towards, instead of away from, antibiotics and releases bacteriocins before dying<sup>54</sup>. While PSMs did not  
250 reduce *P. aeruginosa* viability, we found induction of two pyocins in *P. aeruginosa* in response to both  
251 PSMs pulse-in and co-culture with *S. aureus*, potentially supporting a similar “suicidal chemotaxis” model.  
252 PSMs alone are sufficient to trigger TFP-mediated motility, synthesis and transport of siderophores,  
253 activation of T6SS antagonism and envelope stress responses, suggesting that PSMs are important  
254 interspecies signals that help *P. aeruginosa* sense and respond to imminent danger/competition.  
255 Interestingly, T6SS, pyoverdine production, chemotaxis and cellular response to envelope stress in *P.*  
256 *aeruginosa* are all known to be regulated by cyclic di-GMP<sup>55-59</sup>. We propose herein that secondary  
257 messengers signaling networks mediate “competition sensing” and global bacterial responses to  
258 interspecies insults. In support of this hypothesis, we observed up-regulation of multiple c-di-GMP  
259 metabolizing enzymes, suggesting several c-di-GMP mediated signaling networks are activated and are  
260 involved in *P. aeruginosa* response to PSMs and *S. aureus* (**Supplementary Fig. 7**).

261

262 Further, proteomic analysis detected significantly increased abundance of PA1611, a known inhibitor of  
263 RetS and activator of the global activation of antibiotic and cyanide synthesis/regulator of secondary  
264 metabolism (Gac/Rsm) pathway<sup>59</sup> both in response to PSM treatment and *S. aureus* coculture. Gac/Rsm  
265 post-transcriptionally regulates all three T6SS loci in *P. aeruginosa*<sup>61</sup> and mediates *P. aeruginosa*  
266 response to antagonism (PARA)<sup>10</sup>. Also consistent with previous reports that *P. aeruginosa* T6SS and  
267 T3SS are inversely regulated via RetS<sup>56</sup>, we detected systematic repression of T3SS and simultaneously

268 increased T6SS activity during coinfection with *S. aureus* (**Supplementary Fig. 8**). Intriguingly, the  
269 Gac/Rsm pathway and c-di-GMP signaling networks both regulate T6SS and iron uptake<sup>20,58,59</sup>. Future  
270 work will be dedicated to studying overlap in signal transduction pathways and potential coordination of  
271 interspecies phenotypes reported in this study, including *P. aeruginosa* TFP-mediated directional motility,  
272 downstream antagonistic attacks and exploitive iron scavenging.

273

274 Interestingly, we observed inverse regulation of siderophore biosynthesis in coculture with *S. aureus*  
275 using global proteomics analysis performed *in vitro* versus transcriptomic analysis performed in a host  
276 environment. *P. aeruginosa* down-regulates pyoverdine biosynthesis during coinfection with *S. aureus*  
277 on CF-derived epithelial cells (**Supplementary Fig. 8**). We attribute this to the differences in temporal  
278 resolution of the experiments—while chemo-selective proteomic analysis captured immediate  
279 “competition sensing” responses, global RNA-sequencing investigated long-term coinfection phenotypes.  
280 These results highlight *P. aeruginosa* versatile genetic plasticity in regulating iron scavenging behaviors  
281 during short-term versus long-term competition and underline the importance of studying and comparing  
282 polymicrobial interactions both *in vitro* and *in vivo*.

283

284 Numerous studies have reported that *P. aeruginosa* produces diverse secondary metabolites known to  
285 be toxic to *S. aureus*<sup>14,15</sup>, but insufficient to account for total *S. aureus* cellular death in  
286 coculture<sup>16</sup>. Nonetheless, when embarking on this study, we presumed that *P. aeruginosa* T6SS would  
287 neither be activated by, nor effective in competition with *S. aureus*. Several reasons contributed to this  
288 initial assumption<sup>51</sup>. First, Gram-positive bacteria lack a conjugative pilus, and therefore cannot provoke  
289 *P. aeruginosa* reciprocal firing. Further, the Gram-positive cell wall constitutes a thicker peptidoglycan  
290 (PG) layer in comparison to that of Gram-negative species, which was thought to prohibit penetration by  
291 the T6SS apparatus and effective delivery of toxic effectors. The discovery here that *P. aeruginosa* T6SS  
292 is both induced by and mediates the killing of a Gram-positive pathogen, challenges our prior  
293 assumptions, and expands the role of T6SS during infection, opening a wealth of new opportunities to  
294 study, inhibit, or co-opt interspecies competition.

295

296 How does *P. aeruginosa* T6SS kill *S. aureus*? Intriguingly, proteomic, transcriptional, and mutational  
297 analyses suggest that all three HSI loci have a role in facilitating the killing of *S. aureus*. While we focused  
298 on the HSI-III T6SS effector TseF for further study due to its significantly increased transcript level  
299 revealed by RNA-sequencing analysis, future work will be dedicated to defining the scope and specificity  
300 of functionality for *P. aeruginosa* antagonism against *S. aureus* mediated by T6SS effectors. Moreover,  
301 the global proteomics study was only performed on the *P. aeruginosa* intracellular lysate fraction, which

302 did not include most secreted protein effectors found in the extracellular fraction; thus, it is possible *S.*  
303 *aureus* induces the secretion of T6SS effectors not identified here. A recent study demonstrated that  
304 Tse4, a T6SS muramidase effector of *A. baumannii*, exhibits promiscuous PG-degrading activity and kills  
305 Gram-positive species, including *S. aureus*<sup>50</sup>. While previous literature indicated T6SS-exported  
306 muramidases generally cannot effectively lyse Gram-positive cells<sup>62</sup>, the possibility remains that certain  
307 PG-targeting T6SS effectors can impact cellular functions of Gram-positive bacteria, not limited to  
308 causing cellular death or lysis. Beyond cell wall degrading toxins, developing evidence that suggests the  
309 T6SS apparatus can inject and deliver effectors into the Gram-positive cell wall<sup>50</sup> points to the emerging  
310 possibility that diverse T6SS effectors could have bacteriostatic and bactericidal potential towards both  
311 Gram-negative and Gram-positive bacteria. For instance, studies analyzing differential regulation for *S.*  
312 *aureus* in coculture with *P. aeruginosa* consistently reported up-regulation of SOS response and oxidative  
313 stress response pathways<sup>15,40</sup>, but it remained unclear how *P. aeruginosa* triggers these responses in *S.*  
314 *aureus*. It is therefore curious to speculate that these effects could be due to previously unknown attacks  
315 by *P. aeruginosa* antibacterial T6SS nuclease toxins<sup>63</sup> and NAD(P)<sup>+</sup> glycohydrolases effectors<sup>64</sup>.

316

317 Cumulatively, our findings provide a new model of T6SS-mediated interspecies interactions for Gram-  
318 negative and Gram-positive species. Our results revealed complex polymicrobial virulence factors  
319 crosstalk and highlight the importance of leveraging a comprehensive molecular understanding of  
320 polymicrobial competition while studying the host-pathogen interface. Considering both *Staphylococcal*  
321 PSMs and *P. aeruginosa* T6SS have well-characterized functions in modulating host immune responses,  
322 their interactivity uncovered by our study could have detrimental implications on the host.

323

#### 324 **Acknowledgements:**

325 This work was supported by the Jacobs Institute for Molecular Engineering for Medicine and the Center  
326 for Environmental Microbial Interactions at Caltech, and by the Institute for Collaborative Biotechnologies  
327 through cooperative agreement W911NF-19-2-0026 from the U.S. Army Research Office, the Cystic  
328 Fibrosis Foundation (LIMOLI19R3 to DHL and BOMBER18G0 to JMB), and the National Institutes of  
329 Health (1R35GM142760-01 to DHL and 1R01HL142587 to JMB). We thank Drs. Megan Bergkessel  
330 (University of Dundee), Melanie Spero (University of Oregon), Alex Horswill (University of Colorado  
331 Denver), Mike Schurr (University of Colorado Denver), and Li Wu (University of Iowa) for helpful  
332 discussions and valuable insight. We also thank members of the Limoli and Tirrell Labs for careful editing  
333 of the manuscript and helpful discussions. We thank Dr. Jeff Jones (Caltech) for an in-house pipeline for  
334 proteomics data processing, Dr. J. Muse Davis for the use of the stereoscope, and Drs. Joseph Mougous

335 and Anupama Khare for the generous gifts of the ClpV1-GFPmut3 and *P'pvdA-mScarlet* reporters,  
336 respectively.

337 **Competing interests:** The authors declare no competing interests.

338

### 339 **References**

- 340 1. O'Sullivan, B. P. & Freedman, S. D. Cystic fibrosis. *Lancet (London, England)* **373**, 1891–1904  
341 (2009).
- 342 2. Fischer, A. J. *et al.* Sustained coinfections with *Staphylococcus aureus* and *Pseudomonas*  
343 *aeruginosa* in cystic fibrosis. *Am. J. Respir. Crit. Care Med.* **203**, 328–338 (2021).
- 344 3. Limoli, D. H. *et al.* *Staphylococcus aureus* and *Pseudomonas aeruginosa* coinfection is associated  
345 with cystic fibrosis-related diabetes and poor clinical outcomes. *Eur. J. Clin. Microbiol. Infect. Dis.*  
346 **35**, 947–953 (2016).
- 347 4. Hubert, D. *et al.* Association between *Staphylococcus aureus* alone or combined with  
348 *Pseudomonas aeruginosa* and the clinical condition of patients with cystic fibrosis. *J. Cyst.*  
349 *Fibros. Off. J. Eur. Cyst. Fibros. Soc.* **12**, 497–503 (2013).
- 350 5. Limoli, D. H. *et al.* Interspecies interactions induce exploratory motility in *Pseudomonas*  
351 *aeruginosa*. *elife* **8**, (2019).
- 352 6. Mougous, J. D. *et al.* A virulence locus of *Pseudomonas aeruginosa* encodes a protein secretion  
353 apparatus. *Science* **312**, 1526–1530 (2006).
- 354 7. Pukatzki, S., Ma, A. T., Revel, A. T., Sturtevant, D. & Mekalanos, J. J. Type VI secretion system  
355 translocates a phage tail spike-like protein into target cells where it cross-links actin. *Proc. Natl.*  
356 *Acad. Sci. U. S. A.* **104**, 15508–15513 (2007).
- 357 8. Sana, T. G. *et al.* The second type VI secretion system of *Pseudomonas aeruginosa* strain PAO1  
358 is regulated by quorum sensing and Fur and modulates internalization in epithelial cells. *J. Biol.*  
359 *Chem.* **287**, 27095–27105 (2012).
- 360 9. Basler, M., Ho, B. T. & Mekalanos, J. J. Tit-for-tat: Type VI secretion system counterattack during  
361 bacterial cell-cell interactions. *Cell* **152**, 884–894 (2013).
- 362 10. LeRoux, M. *et al.* Kin cell lysis is a danger signal that activates antibacterial pathways of  
363 *Pseudomonas aeruginosa*. *elife* **4**, e05701 (2015).
- 364 11. Peschel, A. & Otto, M. Phenol-soluble modulins and *Staphylococcal* infection. *Nat. Rev. Microbiol.*  
365 **11**, 667–673 (2013).
- 366 12. Surewaard, B. G. J. *et al.* *Staphylococcal* alpha-phenol soluble modulins contribute to neutrophil  
367 lysis after phagocytosis. *Cell. Microbiol.* **15**, 1427–1437 (2013).

- 368 13. Mashburn, L. M., Jett, A. M., Akins, D. R. & Whiteley, M. *Staphylococcus aureus* serves as an iron  
369 source for *Pseudomonas aeruginosa* during *in vivo* coculture. *J. Bacteriol.* **187**, 554–566 (2005).
- 370 14. Hoffman, L. R. *et al.* Selection for *Staphylococcus aureus* small-colony variants due to growth in  
371 the presence of *Pseudomonas aeruginosa*. *Proc. Natl. Acad. Sci.* **103**, 19890 LP – 19895 (2006).
- 372 15. Filkins, L. M. *et al.* Coculture of *Staphylococcus aureus* with *Pseudomonas aeruginosa* drives *S.*  
373 *aureus* towards fermentative metabolism and reduced viability in a cystic fibrosis model. *J.*  
374 *Bacteriol.* **197**, 2252 LP – 2264 (2015).
- 375 16. Limoli, D. H. *et al.* *Pseudomonas aeruginosa* alginate overproduction promotes coexistence with  
376 *Staphylococcus aureus* in a model of cystic fibrosis respiratory infection. *mBio* **8**, (2017).
- 377 17. Dieterich, D. C., Link, A. J., Graumann, J., Tirrell, D. A. & Schuman, E. M. Selective identification  
378 of newly synthesized proteins in mammalian cells using bioorthogonal noncanonical amino acid  
379 tagging (BONCAT). *Proc. Natl. Acad. Sci.* **103**, 9482 LP – 9487 (2006).
- 380 18. Landgraf, P., Antileo, E. R., Schuman, E. M. & Dieterich, D. C. BONCAT: metabolic labeling, click  
381 chemistry, and affinity purification of newly synthesized proteomes. *Methods Mol. Biol.* **1266**, 199–  
382 215 (2015).
- 383 19. Silverman, J. M., Brunet, Y. R., Cascales, E. & Mougous, J. D. Structure and regulation of the type  
384 VI secretion system. *Annu. Rev. Microbiol.* **66**, 453–472 (2012).
- 385 20. Chen, L., Zou, Y., She, P. & Wu, Y. Composition, function, and regulation of T6SS in  
386 *Pseudomonas aeruginosa*. *Microbiol. Res.* **172**, 19–25 (2015).
- 387 21. Stefan, P. *et al.* Identification of a conserved bacterial protein secretion system in *Vibrio cholerae*  
388 using the *Dictyostelium* host model system. *Proc. Natl. Acad. Sci.* **103**, 1528–1533 (2006).
- 389 22. Brodmann, M., Dreier, R. F., Broz, P. & Basler, M. *Francisella* requires dynamic type VI secretion  
390 system and ClpB to deliver effectors for phagosomal escape. *Nat. Commun.* **8**, 15853 (2017).
- 391 23. Mougous, J. D., Gifford, C. A., Ramsdell, T. L. & Mekalanos, J. J. Threonine phosphorylation post-  
392 translationally regulates protein secretion in *Pseudomonas aeruginosa*. *Nat. Cell Biol.* **9**, 797–803  
393 (2007).
- 394 24. Silverman, J. M. *et al.* Haemolysin coregulated protein is an exported receptor and chaperone of  
395 type VI secretion substrates. *Mol. Cell* **51**, 584–593 (2013).
- 396 25. Braud, A., Hoegy, F., Jezequel, K., Lebeau, T. & Schalk, I. J. New insights into the metal specificity  
397 of the *Pseudomonas aeruginosa* pyoverdine-iron uptake pathway. *Environ. Microbiol.* **11**, 1079–  
398 1091 (2009).
- 399 26. EHUD, B., L., V. M. & Peter, G. E. Iron and *Pseudomonas aeruginosa* biofilm formation. *Proc. Natl.*  
400 *Acad. Sci.* **102**, 11076–11081 (2005).

- 401 27. Leoni, L., Orsi, N., de Lorenzo, V. & Visca, P. Functional analysis of PvdS, an iron starvation sigma  
402 factor of *Pseudomonas aeruginosa*. *J. Bacteriol.* **182**, 1481–1491 (2000).
- 403 28. Wandersman, C. & Delepelaire, P. Bacterial iron sources: from siderophores to hemophores. *Annu.*  
404 *Rev. Microbiol.* **58**, 611–647 (2004).
- 405 29. Zarrella, T. M. & Khare, A. Systematic identification of molecular mediators of interspecies sensing  
406 in a community of two frequently coinfecting bacterial pathogens. *PLoS Biol.* **20**, e3001679 (2022).
- 407 30. Tognon, M., Köhler, T., Luscher, A. & van Delden, C. Transcriptional profiling of *Pseudomonas*  
408 *aeruginosa* and *Staphylococcus aureus* during *in vitro* coculture. *BMC Genomics* **20**, 30 (2019).
- 409 31. Leinweber, A., Weigert, M. & Kümmerli, R. The bacterium *Pseudomonas aeruginosa* senses and  
410 gradually responds to interspecific competition for iron. *Evolution (N. Y.)*. **72**, 1515–1528 (2018).
- 411 32. Stolle, A.-S., Meader, B. T., Toska, J. & Mekalanos, J. J. Endogenous membrane stress induces  
412 T6SS activity in *Pseudomonas aeruginosa*. *Proc. Natl. Acad. Sci. U. S. A.* **118**, (2021).
- 413 33. Cheung, G. Y. C., Joo, H.-S., Chatterjee, S. S. & Otto, M. Phenol-soluble modulins—critical  
414 determinants of *Staphylococcal* virulence. *FEMS Microbiol. Rev.* **38**, 698–719 (2014).
- 415 34. Ulhuq, F. R. & Mariano, G. Bacterial pore-forming toxins. *Microbiology* **168**, (2022).
- 416 35. Kizaki, H. *et al.* Cell-surface phenol soluble modulins regulate *Staphylococcus aureus* colony  
417 spreading. *PLoS One* **11**, e0164523 (2016).
- 418 36. Tsviklist, V., Guest, R. L. & Raivio, T. L. The Cpx stress response regulates turnover of respiratory  
419 chain proteins at the inner membrane of *Escherichia coli*. *Frontiers in Microbiology* **12**, (2022).
- 420 37. Guest, R. L., Wang, J., Wong, J. L. & Raivio, T. L. A bacterial stress response regulates respiratory  
421 protein complexes to control envelope stress adaptation. *J. Bacteriol.* **199**, (2017).
- 422 38. Raivio, T. L., Leblanc, S. K. D. & Price, N. L. The *Escherichia coli* Cpx envelope stress response  
423 regulates genes of diverse function that impact antibiotic resistance and membrane integrity. *J.*  
424 *Bacteriol.* **195**, 2755–2767 (2013).
- 425 39. Hews, C. L., Cho, T., Rowley, G. & Raivio, T. L. Maintaining integrity under stress: Envelope stress  
426 response regulation of pathogenesis in Gram-negative bacteria. *Front. Cell. Infect. Microbiol.* **9**,  
427 313 (2019).
- 428 40. Manganelli, R. & Gennaro, M. L. Protecting from envelope stress: Variations on the phage-shock-  
429 protein theme. *Trends Microbiol.* **25**, 205–216 (2017).
- 430 41. Brissette, J. L., Russel, M., Weiner, L. & Model, P. Phage shock protein, a stress protein of  
431 *Escherichia coli*. *Proc. Natl. Acad. Sci.* **87**, 862–866 (1990).
- 432 42. Chugani, S. & Greenberg, E. P. The influence of human respiratory epithelia on *Pseudomonas*  
433 *aeruginosa* gene expression. *Microb. Pathog.* **42**, 29–35 (2007).

- 434 43. King, J. M., Kulhankova, K., Stach, C. S., Vu, B. G. & Salgado-Pabón, W. Phenotypes and  
435 virulence among *Staphylococcus aureus* USA100, USA200, USA300, USA400, and USA600  
436 clonal lineages. *mSphere* **1**, (2016).
- 437 44. Grundstad, M. L. *et al.* Quorum sensing, virulence, and antibiotic resistance of USA100 methicillin-  
438 resistant *Staphylococcus aureus* isolates. *mSphere* **4**, (2019).
- 439 45. Armbruster, C. R. *et al.* Adaptation and genomic erosion in fragmented *Pseudomonas aeruginosa*  
440 populations in the sinuses of people with cystic fibrosis. *Cell Rep.* **37**, 109829 (2021).
- 441 46. Cornforth, D. M., Diggle, F. L., Melvin, J. A., Bomberger, J. M. & Whiteley, M. Quantitative  
442 framework for model evaluation in microbiology research using *Pseudomonas aeruginosa* and  
443 cystic fibrosis infection as a test case. *mBio* **11**, (2020).
- 444 47. Russell, A. B. *et al.* Type VI secretion delivers bacteriolytic effectors to target cells. *Nature* **475**,  
445 343–347 (2011).
- 446 48. Wettstadt, S., Wood, T. E., Fecht, S. & Filloux, A. Delivery of the *Pseudomonas aeruginosa*  
447 phospholipase effectors PldA and PldB in a VgrG- and H2-T6SS-dependent manner. *Front.*  
448 *Microbiol.* **10**, 1718 (2019).
- 449 49. Lin, J. *et al.* A *Pseudomonas* T6SS effector recruits PQS-containing outer membrane vesicles for  
450 iron acquisition. *Nat. Commun.* **8**, 14888 (2017).
- 451 50. Nguyen-Hung, L., Victor, P., Juvenal, L., Felipe, C. & F., F. M. Killing of Gram-negative and Gram-  
452 positive bacteria by a bifunctional cell wall-targeting T6SS effector. *Proc. Natl. Acad. Sci.* **118**,  
453 e2106555118 (2021).
- 454 51. Hersch, S. J., Manera, K. & Dong, T. G. Defending against the type six secretion system: beyond  
455 immunity genes. *Cell Rep.* **33**, 108259 (2020).
- 456 52. Cornforth, D. M. & Foster, K. R. Competition sensing: the social side of bacterial stress responses.  
457 *Nat. Rev. Microbiol.* **11**, 285–293 (2013).
- 458 53. Keane, R. & Berleman, J. The predatory life cycle of *Myxococcus xanthus*. *Microbiology* **162**, 1–  
459 11 (2016).
- 460 54. Oliveira, N. M. *et al.* Suicidal chemotaxis in bacteria. *Nat. Commun.* **13**, 7608 (2022).
- 461 55. Ha, D.G. & O’Toole, G. A. c-di-GMP and its effects on biofilm formation and dispersion: a  
462 *Pseudomonas aeruginosa* review. *Microbiol. Spectr.* **3**, MB-0003-2014 (2015).
- 463 56. Moscoso, J. A., Mikkelsen, H., Heeb, S., Williams, P. & Filloux, A. The *Pseudomonas aeruginosa*  
464 sensor RetS switches type III and type VI secretion via c-di-GMP signaling. *Environ. Microbiol.* **13**,  
465 3128–3138 (2011).
- 466 57. O’Neal, L. *et al.* The Wsp system of *Pseudomonas aeruginosa* links surface sensing and cell  
467 envelope stress. *Proc. Natl. Acad. Sci.* **119**, e2117633119 (2022).

- 468 58. Chen, Y. *et al.* Multiple diguanylate cyclase-coordinated regulation of pyoverdine synthesis in  
469 *Pseudomonas aeruginosa*. *Environ. Microbiol. Rep.* **7**, 498–507 (2015).
- 470 59. Frangipani, E. *et al.* The Gac/Rsm and cyclic-di-GMP signaling networks coordinately regulate iron  
471 uptake in *Pseudomonas aeruginosa*. *Environ. Microbiol.* **16**, 676–688 (2014).
- 472 60. Chambonnier, G. *et al.* The hybrid histidine kinase LadS forms a multicomponent signal  
473 transduction system with the GacS/GacA two-component system in *Pseudomonas aeruginosa*.  
474 *PLoS Genet.* **12**, e1006032 (2016).
- 475 61. Allsopp, L. P. *et al.* RsmA and AmrZ orchestrate the assembly of all three type VI secretion systems  
476 in *Pseudomonas aeruginosa*. *Proc. Natl. Acad. Sci.* **114**, 7707 LP – 7712 (2017).
- 477 62. Chou, S. *et al.* Structure of a peptidoglycan amidase effector targeted to Gram-negative bacteria  
478 by the type VI secretion system. *Cell Rep.* **1**, 656–664 (2012).
- 479 63. Pissaridou, P. *et al.* The *Pseudomonas aeruginosa* T6SS-VgrG1b spike is topped by a PAAR  
480 protein eliciting DNA damage to bacterial competitors. *Proc. Natl. Acad. Sci. U. S. A.* **115**, 12519–  
481 12524 (2018).
- 482 64. Whitney, J. C. *et al.* An interbacterial NAD(P)(+) glycohydrolase toxin requires elongation factor  
483 Tu for delivery to target cells. *Cell* **163**, 607–619 (2015).



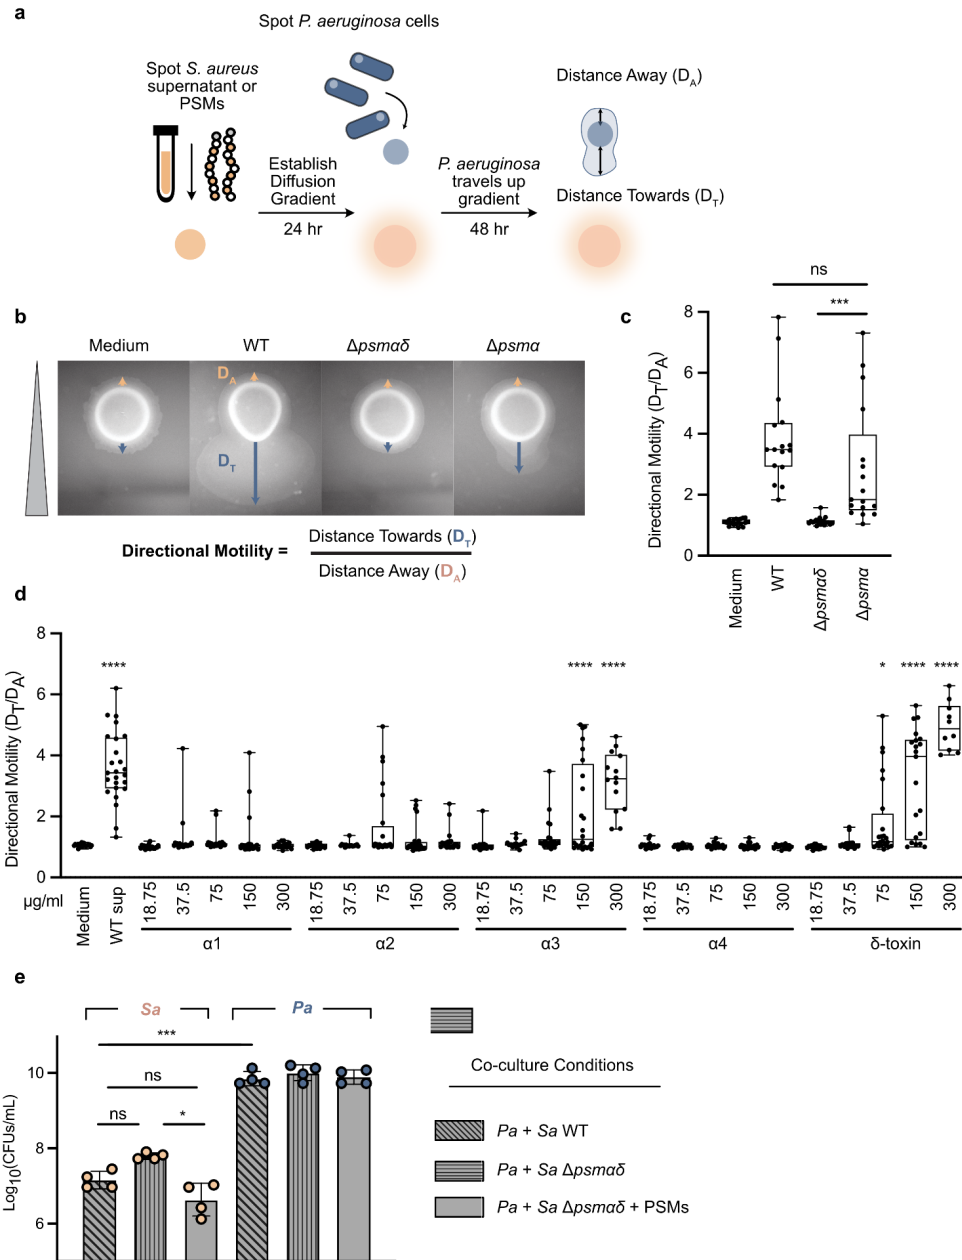

484

485 **Figure 1. PSM $\alpha$  peptides are necessary and sufficient for *P. aeruginosa* attraction towards *S.***  
 486 ***aureus*.**

487 **a.** Schematic of macroscopic TFP-mediated chemotaxis assays to monitor directional *P. aeruginosa*  
 488 motility up a pre-established gradient of cell-free *S. aureus* supernatant. Directional motility was  
 489 calculated as ratio of the motility distance towards ( $D_T$ ) over distance away ( $D_A$ ) from *S. aureus*  
 490 supernatant spots. **b.** Representative images of *P. aeruginosa* WT in the presence of a gradient of *S.*  
 491 *aureus* growth medium or supernatant derived from the indicated strains ( $\Delta psma1-4$  and  $\Delta psma1-4$

492  $\delta$ ATG-ATT and  $\Delta$ psm $\alpha$ 1–4  $\Delta$  $\beta$ 1–2  $\delta$ ATG-ATT). Quantification of directional motility towards a gradient of  
493 *S. aureus* supernatant (**c**) or synthetic PSM peptides (**d**) with the median, interquartile range, maximum  
494 and minimum indicated for three independent experiments performed in triplicate. Statistical significance  
495 was determined by one-way ANOVA followed by Dunnett's multiple comparisons test. ns, not significant;  
496 \*,  $P \leq 0.05$ ; \*\*\*,  $P \leq 0.001$ ; \*\*\*\*,  $P \leq 0.0001$ . **e.** CFU enumeration for indicated *P. aeruginosa* and *S.*  
497 *aureus* strains in coculture. Statistical significance was determined by one-way ANOVA followed by  
498 Tukey's multiple comparisons test. ns, not significant; \*,  $P \leq 0.05$ ; \*\*\*,  $P \leq 0.001$ .

499

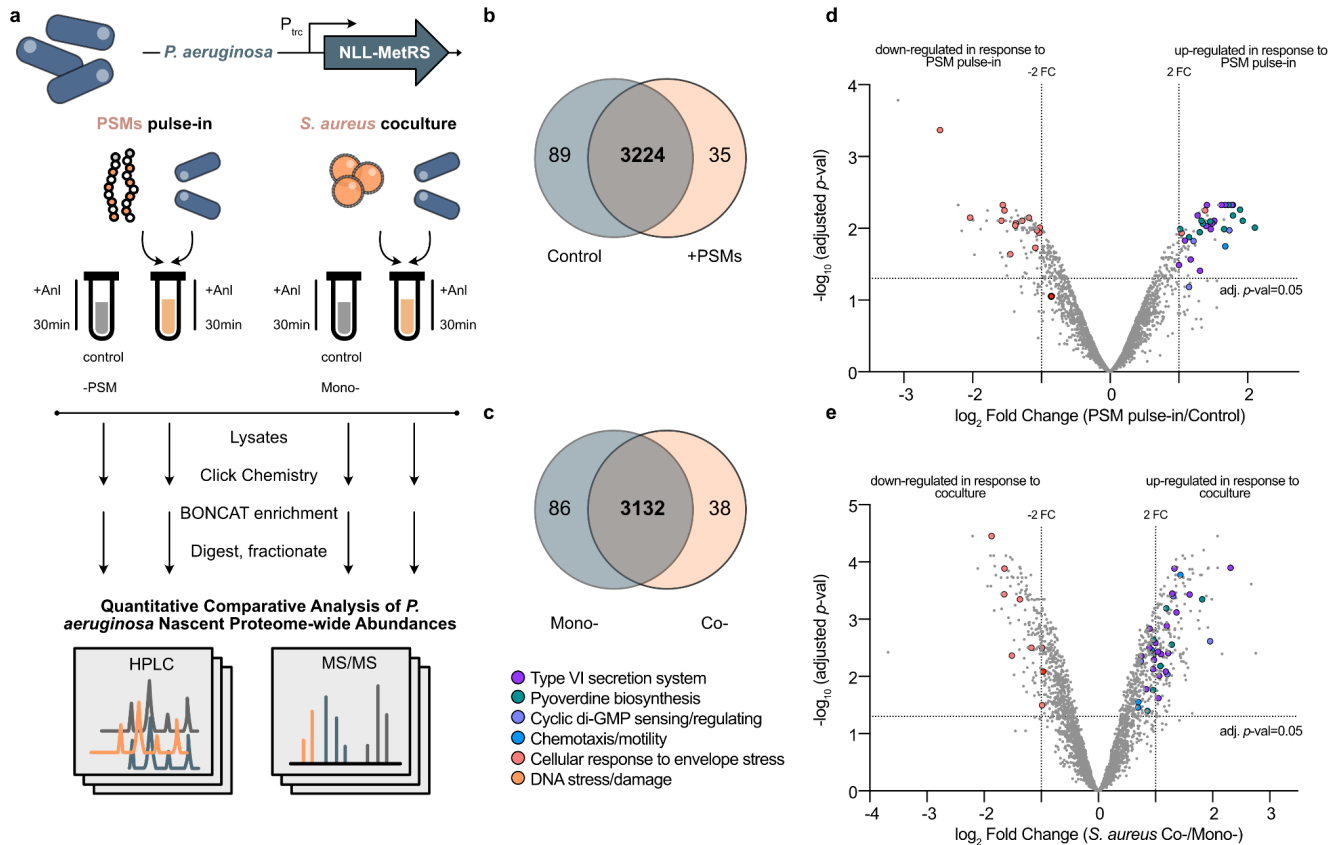

500

501 **Figure 2. Time-resolved proteome mapping reveals *P. aeruginosa* immediate global responses to**  
 502 **PSM peptides pulse-in and coculture with *S. aureus* cells.**

503 *P. aeruginosa* cells were engineered to express a mutant tRNA synthetase that allows for metabolic  
 504 labeling of newly synthesized proteins by a non-canonical amino acid azidonorLeucine (Anl). **a.**  
 505 Schematic depiction of BONCAT experimental workflow. *P. aeruginosa* protein synthesis immediately  
 506 following treatment of PSMs pulse-in or coculture with *S. aureus* cells is labeled with Anl for 30 minutes,  
 507 selectively enriched, and analyzed to compare global nascent proteome abundances with that of  
 508 untreated control. **b.** Venn diagram showing total proteins quantified for differential expression (overlap)  
 509 and proteins uniquely identified in +/- PSM pulse-in (**b**) or +/- *S. aureus* coculture (**c**). **d.** Volcano plots  
 510 summarizing the global proteomic comparisons for +/- PSMs pulse-in conditions and *S. aureus* coculture  
 511 vs. monoculture conditions (**e**). Protein expression fold-changes between sample groups were calculated  
 512 via label-free quantification. “Hits” that showed statistically significant changes (Benjamini–Hochberg  
 513 false-discovery rate adjusted,  $P < 0.05$ ) in abundances in response to PSM pulse-in and *S. aureus*  
 514 coculture include proteins involved in: type VI secretion system, pyoverdine biosynthesis, c-di-GMP  
 515 regulation, chemotaxis, motility and cellular responses to envelope stress. n=3 biological replicates for  
 516 PSM pulse-in proteomics analysis and n=4 for *S. aureus* coculture proteomics analysis.

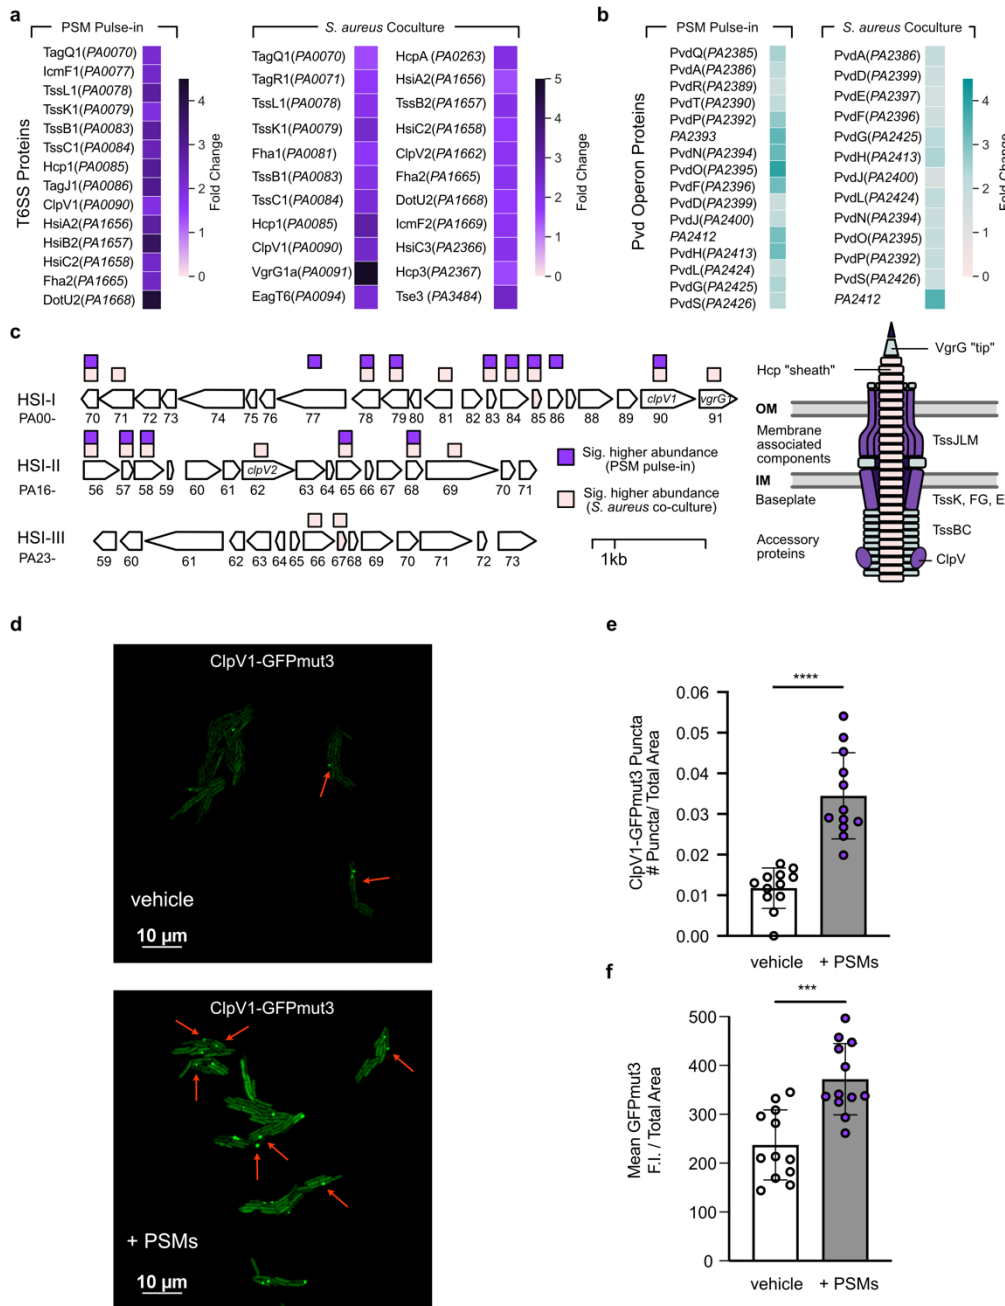

517

518 **Figure 3. PSMs are interspecies signals that trigger *P. aeruginosa* T6SS antagonism and**  
 519 **“competitive stress response”.**

520 *P. aeruginosa* induction of T6SS (a) and Pvd proteins (b) in response to PSMs pulse-in and coculture  
 521 with *S. aureus* cells. T6SS and pyoverdine biosynthesis proteins with significantly up-regulated fold-  
 522 changes in response to PSMs pulse-in or *S. aureus* coculture are summarized in associated heatmaps.  
 523 c. Schematic depiction of the *P. aeruginosa* T6SS genetic loci and the 3 HSI-T6SS clusters in *P.*  
 524 *aeruginosa* (HSI-I, HSI-II and HSI-III, left) and the structural architecture of the apparatus (right). Squares

525 represent significantly up-regulated in response to PSM pulse-in (purple) or *S. aureus* coculture (peach).  
526 **d.** Representative microscopy images of *P. aeruginosa* ClpV1-GFPmut3 fluorescence with vehicle control  
527 (water, top) and with synthetic PSM treatment (8 µg/mL, bottom). Examples of ClpV1 fluorescent puncta  
528 formation are highlighted with arrows (red). Quantification of number of ClpV1-GFPmut3 fluorescent  
529 puncta per cellular total area is shown in (e) and mean GFPmut3 fluorescence intensity (F.I.) per cellular  
530 total area in (f). Data represent a total of three biological replicates with four technical replicates (FOVs)  
531 per condition, per biological replicate, analyzed. Statistical significance was determined by unpaired *t*-  
532 test: \*\*\*,  $P = 0.0001$ ; \*\*\*\*,  $P \leq 0.0001$ .

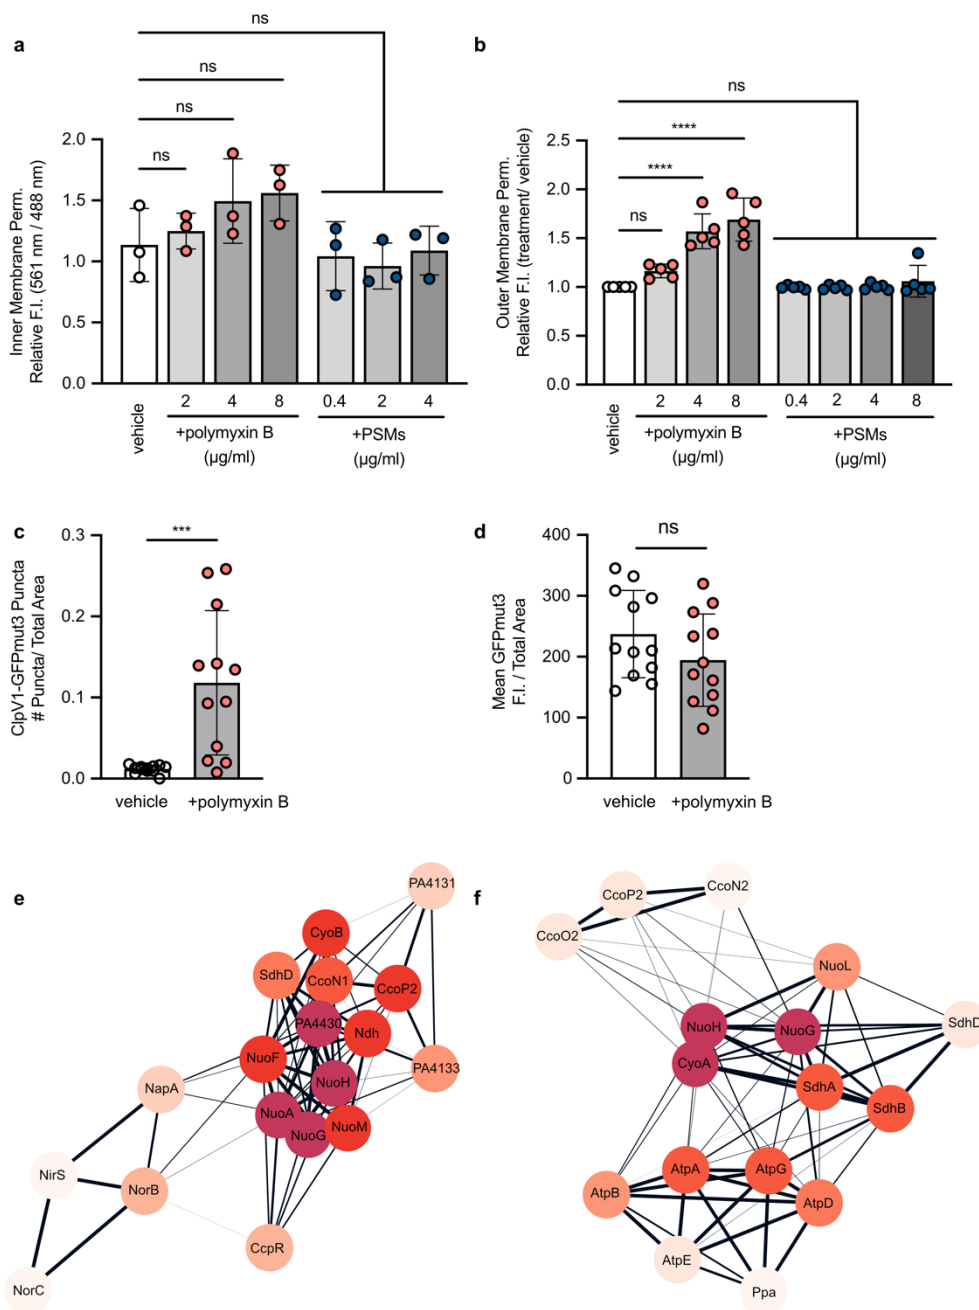

533

534 **Figure 4. PSMs may activate competition sensing via induction of transient membrane stress.**

535 **a.** Inner membrane permeability was determined by calculating the ratio of propidium iodide fluorescence to GFP fluorescence of PA14 *Ptac-gfp* exposed to the indicated total concentrations of polymyxin B or  
 536 to GFP fluorescence of PA14 *Ptac-gfp* exposed to the indicated total concentrations of polymyxin B or  
 537 synthetic PSMa1 and PSMa3. **b.** Outer membrane permeability was determined by measuring NPN  
 538 fluorescence of *P. aeruginosa* cells incubated with polymyxin B or PSMs. Data shown represent the mean  
 539 and standard deviation of at least three independent experiments. For **a-b**, statistical significance was  
 540 determined by one-way ANOVA followed by Dunnett's multiple comparisons test. \*\*\*,  $P \leq 0.001$ ; \*\*\*\*,  $P$

541  $\leq 0.0001$ . **c.** Quantification of number of ClpV1-GFPmut3 fluorescent puncta per cellular total area  
542 following treatment with polymyxin B. **d.** Mean GFPmut3 fluorescence intensity (F.I.) per cellular total  
543 area following treatment with polymyxin B. For **c-d**, Data represents a total of three biological replicates  
544 with four technical replicates (FOVs) per condition, per biological replicate, analyzed. Statistical  
545 significance was determined by unpaired *t*-test: ns, not significant; \*\*\*,  $P \leq 0.001$ . See representative  
546 microscopy images in **Supplementary Fig. 6b**. STRING protein interaction network for ETC proteins  
547 with significantly decreased abundances in PSM pulse-in (**e**) and in response to *S. aureus* coculture (**f**).  
548

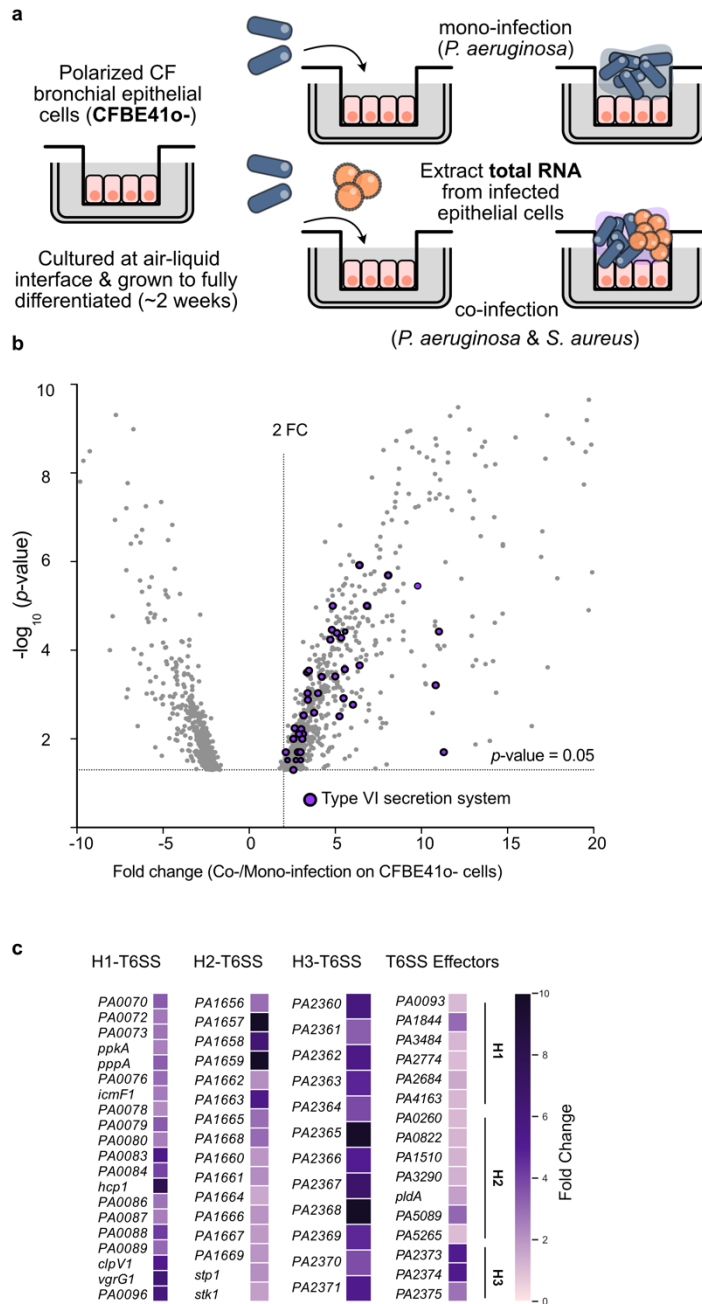

549

550 **Figure 5. *P. aeruginosa* T6SS activity is significantly increased during coculture with *S. aureus***  
 551 **on CF patient-derived bronchial epithelial cells.**

552 **a.** Schematic of dual-species RNA-seq approach. CF bronchial epithelial cells (CFBE41o-) were seeded  
 553 at air-liquid interface and allowed to fully differentiate. Polarized cells were infected apically with *P.*  
 554 *aeruginosa* alone or cocultured with *S. aureus* for 6 hours before total RNA was collected. **b.** Volcano  
 555 plot summarizing differentially expressed *P. aeruginosa* genes in coculture with *S. aureus* as compared  
 556 to *P. aeruginosa* mono-infection. **c.** Heatmaps summarizing significant differential fold changes of T6SS



557 genes grouped by the three HSI-T6SS clusters. Data represent the mean fold change from two  
558 independent, biological replicates.

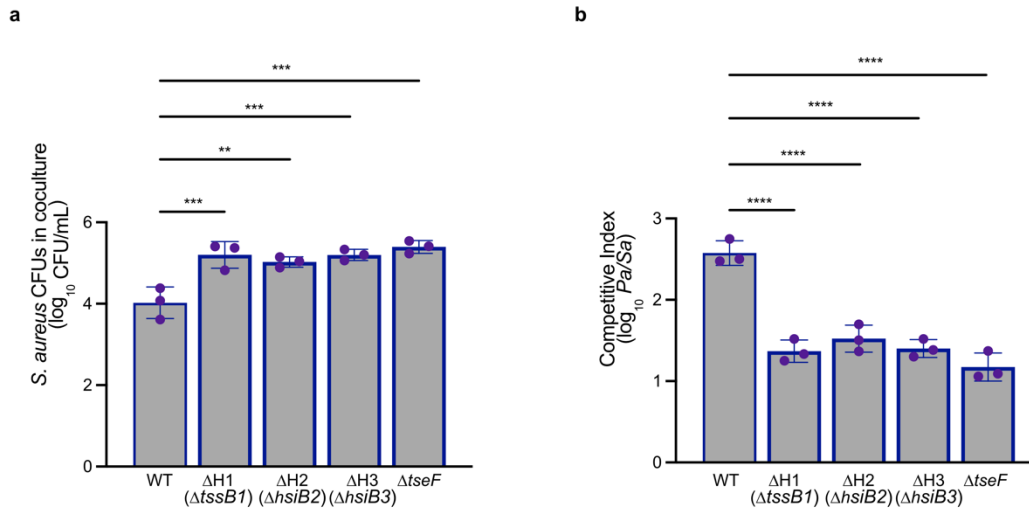

559

560 **Figure 6. *P. aeruginosa* T6SS contributes to competition with *S. aureus*.** Coculture CFU  
561 enumeration of *S. aureus* in coculture with *P. aeruginosa* on CFBE41o- cells. **a.** *S. aureus* survival **b.** *P.*  
562 *aeruginosa* competitive indexes (log<sub>10</sub> (*Pa* CFU / *Sa* CFU)) for indicated mutant strains. Data represent  
563 three independent biological replicates. Statistical significance was determined by one-way ANOVA  
564 followed by Dunnett's multiple comparisons test. \*\*,  $P \leq 0.01$ ; \*\*\*,  $P \leq 0.001$ ; \*\*\*\*,  $P \leq 0.0001$ .

565

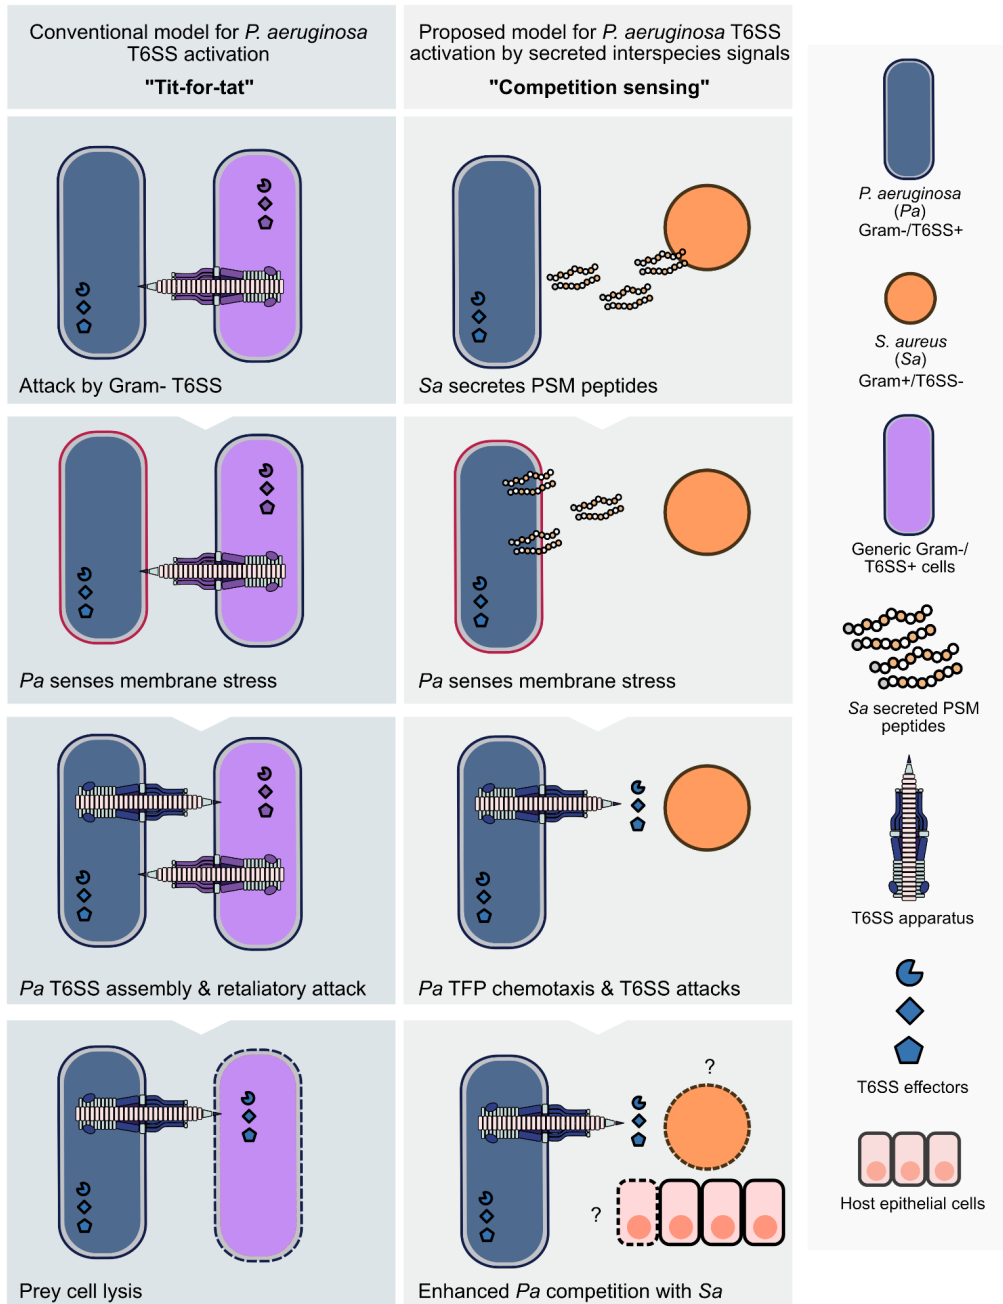

566

567 **Figure 7. Proposed model for *P. aeruginosa* T6SS activation by *S. aureus* secreted interspecies**  
 568 **signals.**

569 *P. aeruginosa* has been characterized to activate its T6SS following exogenous attacks in a "tit-for-tat"  
 570 pattern (left panel), assembling the T6SS apparatus and preferentially firing at other Gram-negative,  
 571 T6SS-positive species. T6SS "dueling" is known to result in the lysis and death of the competitor (left).  
 572 In "competition sensing" (right panel), *P. aeruginosa* detects *Staphylococcal* secreted PSM peptides  
 573 (potentially through membrane stress), subsequently travels towards *S. aureus* with increased  
 574 directional motility and simultaneously activates T6SS firing. *P. aeruginosa* T6SS activation is sustained  
 575 during coinfection with *S. aureus* and results in enhanced competitive fitness against *S. aureus*.

576 Effectors may be delivered by T6SS apparatus or secreted extracellularly and have bactericidal or  
577 static action towards *S. aureus*. Increased *P. aeruginosa* T6SS activity, particularly of the HSI-II and III,  
578 during coinfection may have detrimental consequences on host epithelial cells and contribute to  
579 worsened CF patient clinical outcome.
